# Supplementary material for: Microglia Morphological Changes in the Motor Cortex of hSOD1G93A Transgenic ALS Mice
Source: MDPI journal article supplement (doi:10.3390/brainsci11060807), 2021-06-18
Supplement: s1 [file s1]

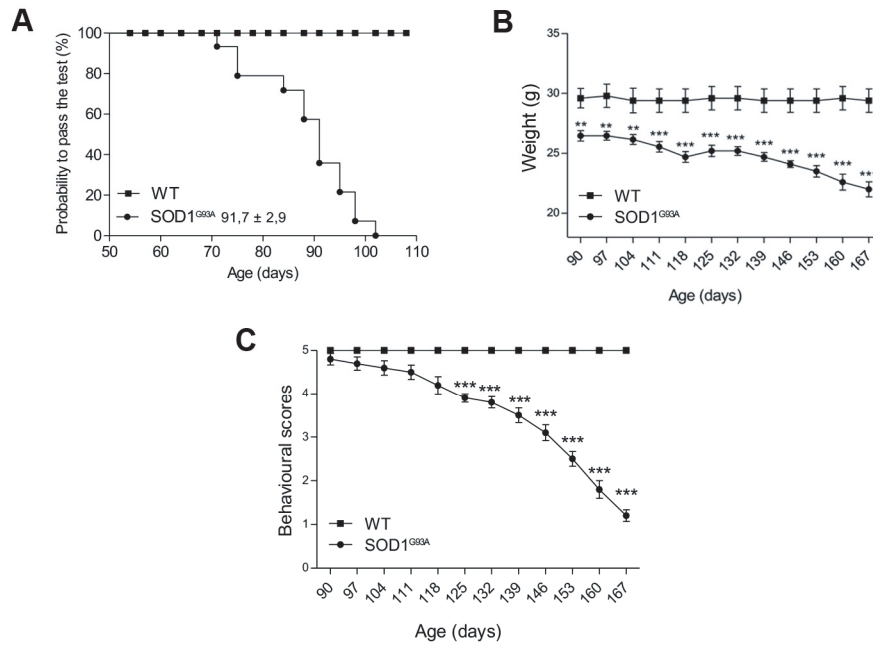

Figure S1. **A)** Kaplan-Meier representing the disease onset of SOD1G93A mice compared WT mice based on the hanging grip test (see Material and Methods). Weight **(B)** and behavioural score **(C)** evolution of SOD1G93A and WT mice. \*\*p<0,01, \*\*\*p<0,0001. At least n=12/group. p Value was obtained using parametric two-way ANOVA and Bonferroni post hoc test.

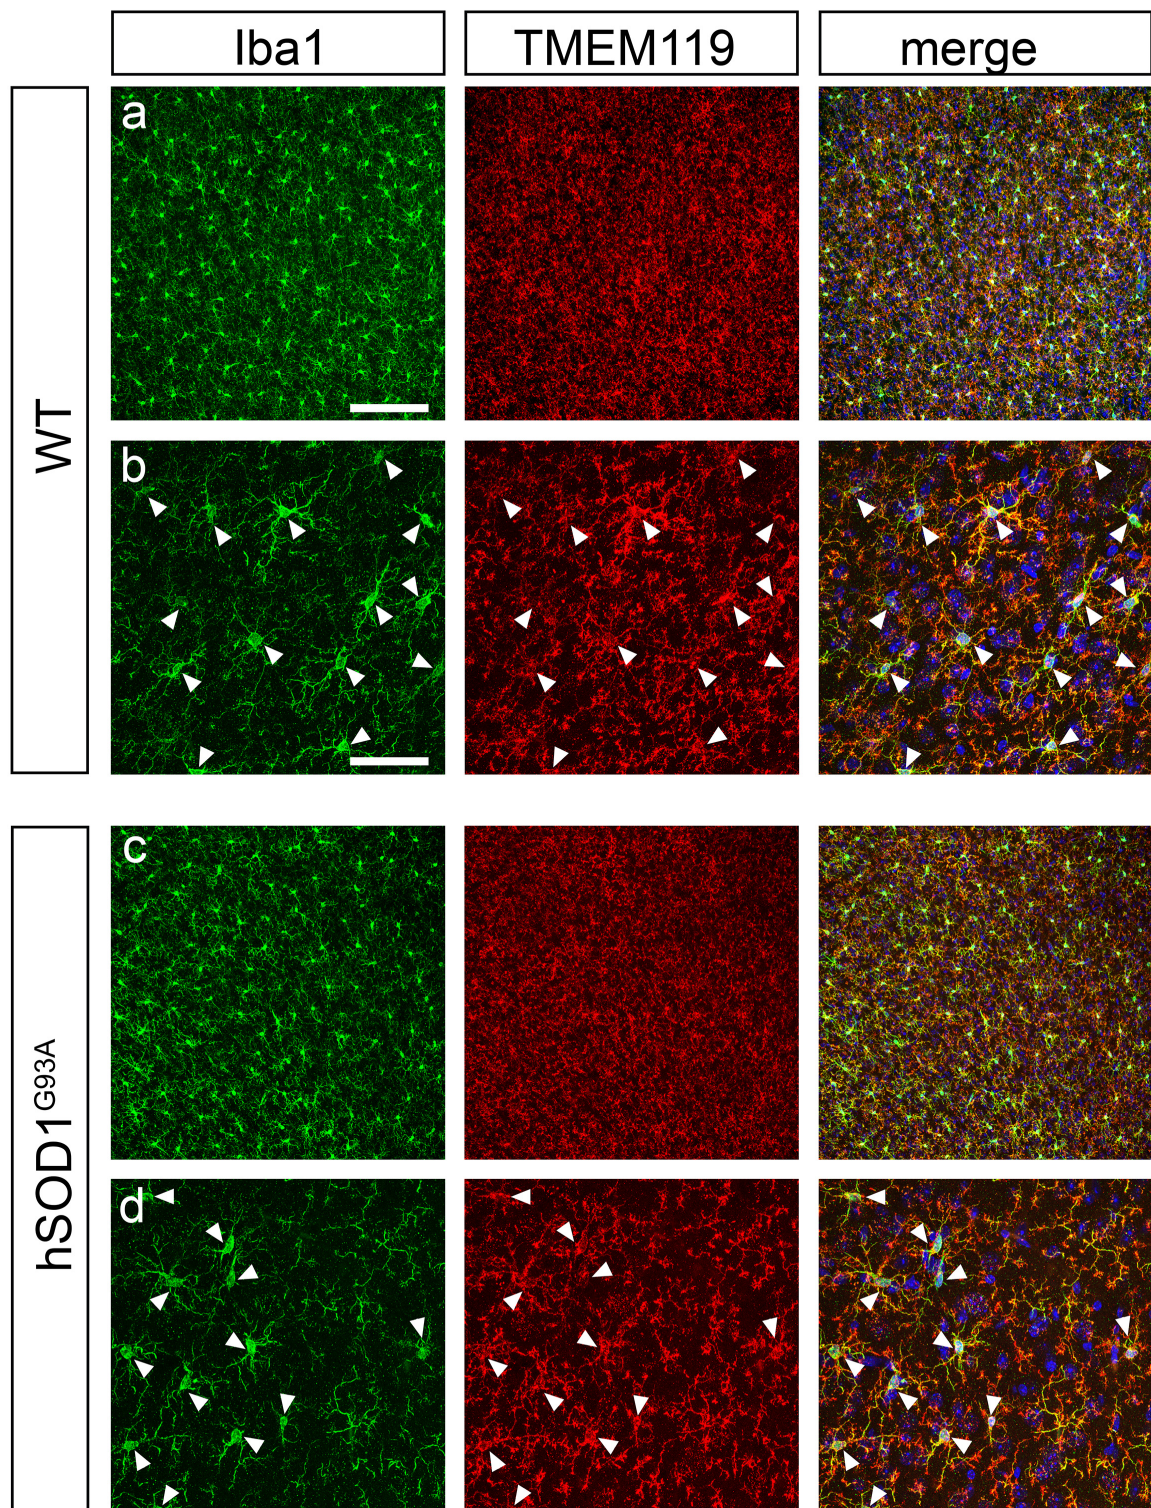

Figure S2. Representative confocal images of microglia in motor cortex coronal sections showing Iba1 and TMEM119 immunoreactivity in WT (**a-b**) and hSOD1<sup>G93A</sup> (**c-d**) 90-day-old mice. Arrowheads point to the soma of Iba1 and TMEM119 double labeled cells. Scale bar: 150  $\mu$ m (**a,c**) and 50  $\mu$ m (**b,d**).
